# Supplementary material for: Targeting steroid receptor RNA activator (SRA), a long non-coding RNA, enhances melanogenesis through activation of TRP1 and inhibition of p38 phosphorylation
Source: PubMed Central journal article supplement (PMC7425936; doi:10.1371/journal.pone.0237577), 2020-08-13
Supplement: pone.0237577.s001.pdf [file pone.0237577.s001.pdf]

1B actin

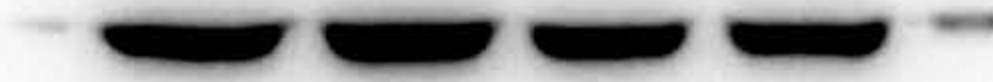

X

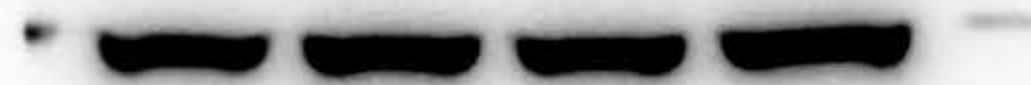

X

1 2 3 4

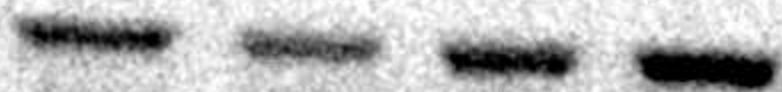

20ul

1 2 3 4

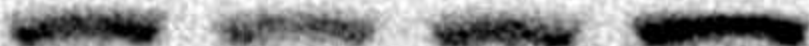

25ul

1B SRAP

1C actin

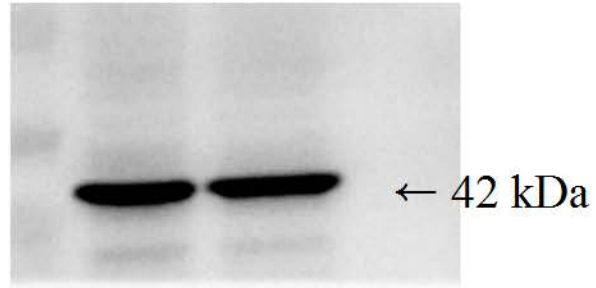

1C MITF

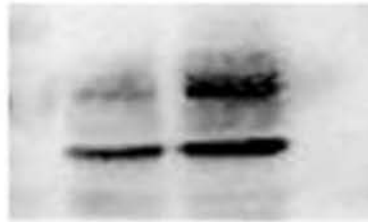

← 52 kDa

1C TRP-1

 ← 75 kDa

# 1C TRP-2

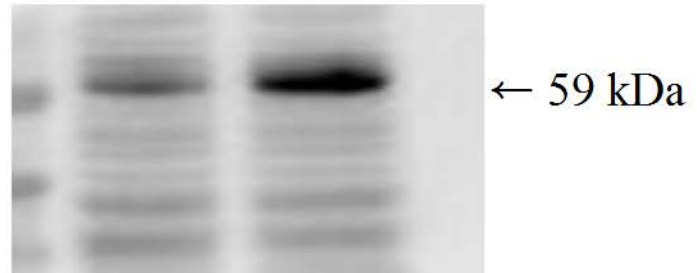

1C TYR

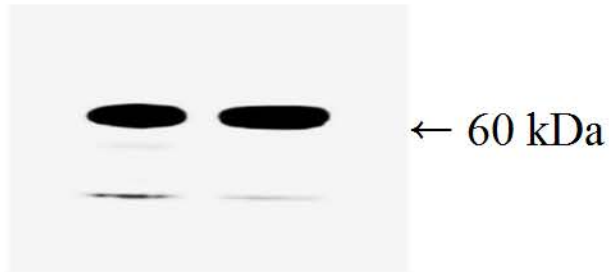

3A actin

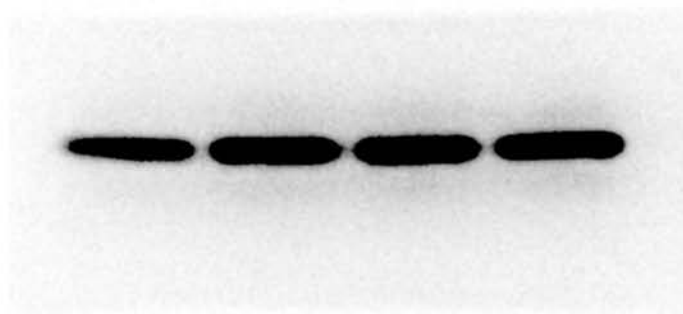

X X



### 3A Notch-1

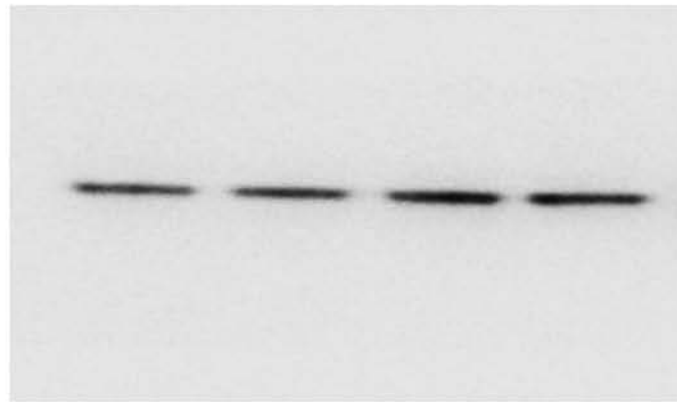

X X

3A p38

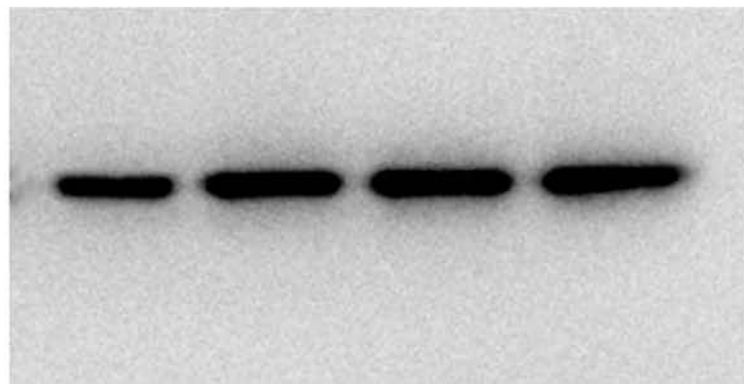

X X

3A pp38

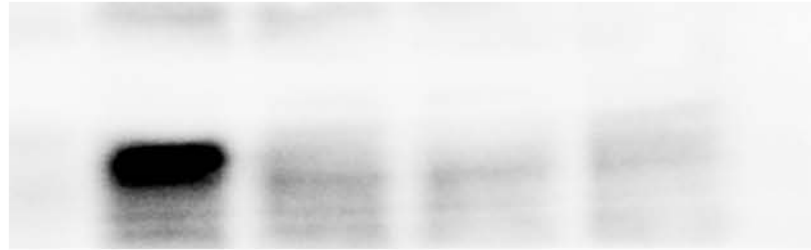

X X

# 4A actin

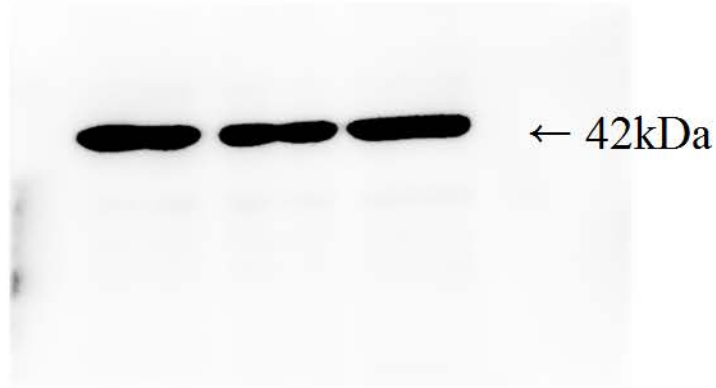

# 4A MITF

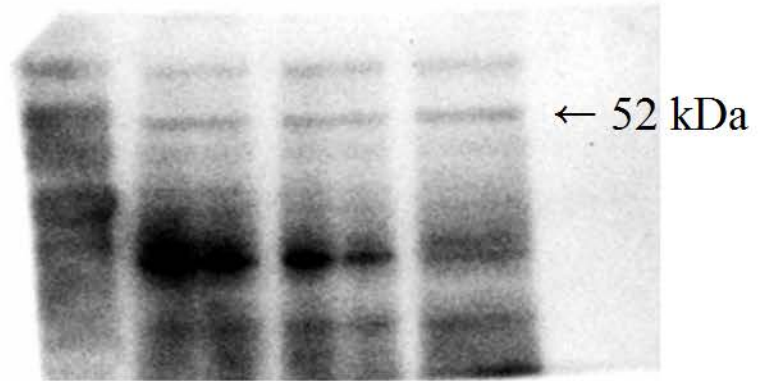

# 4A TRP-1

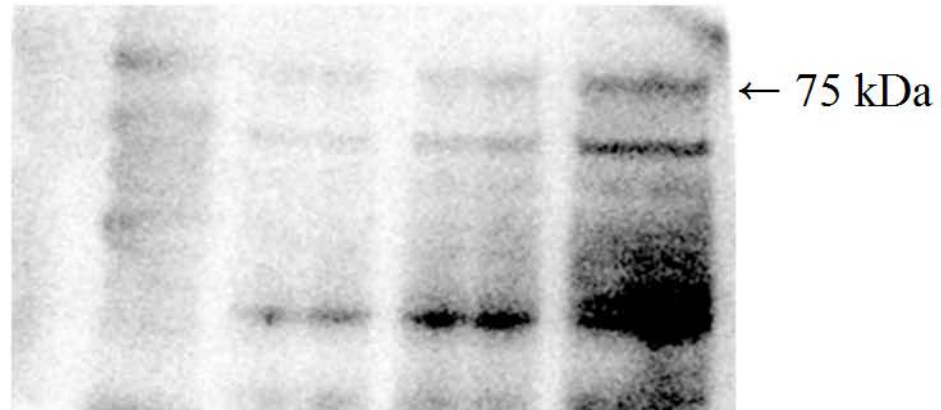

## 4A TRP-2

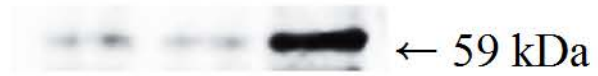

4A TYR

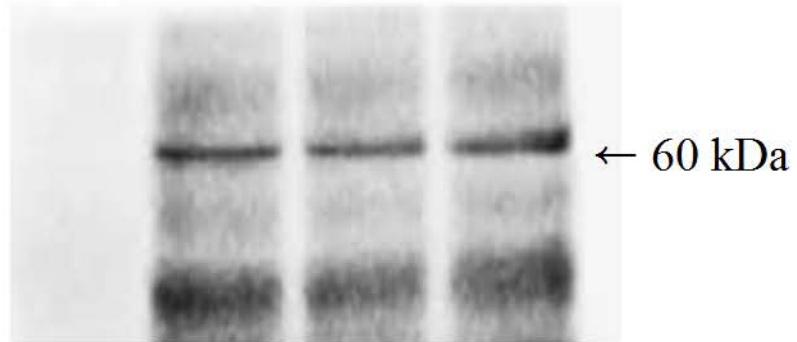



4C actin

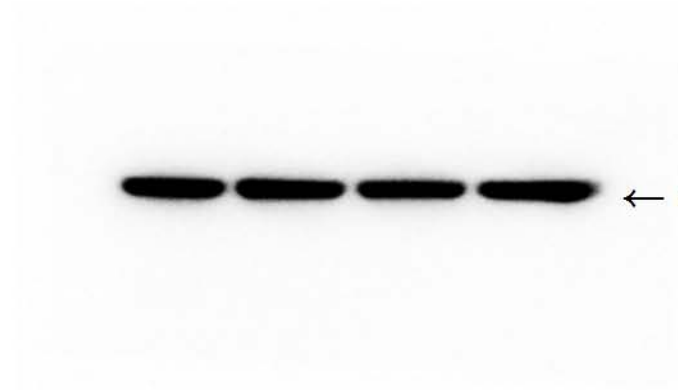

← 42kDa

# 4C MITF

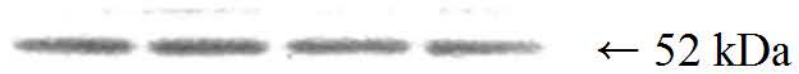

4C p38

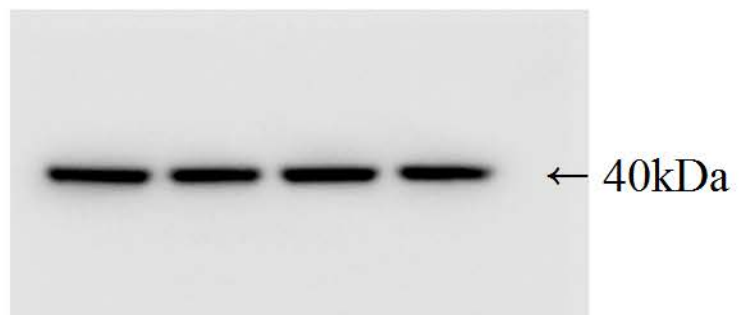

4C pp38

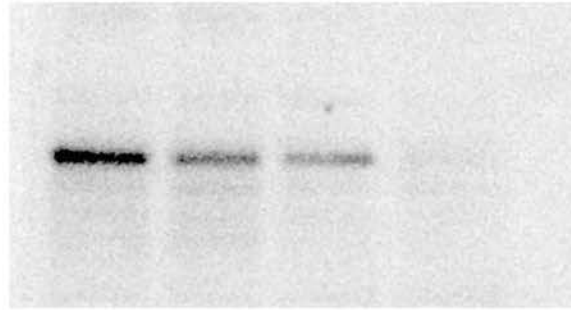

← 43 kDa

# 4C TRP-1

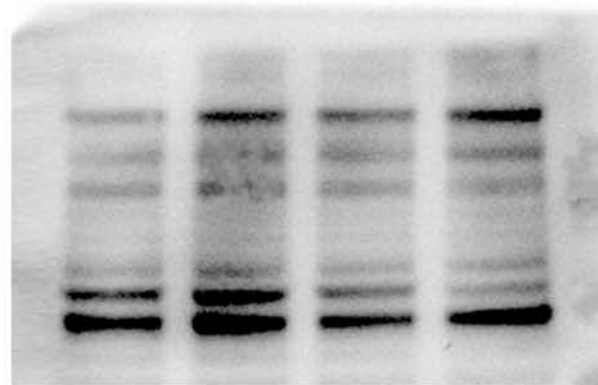

← 75 kDa

## 4C TRP-2

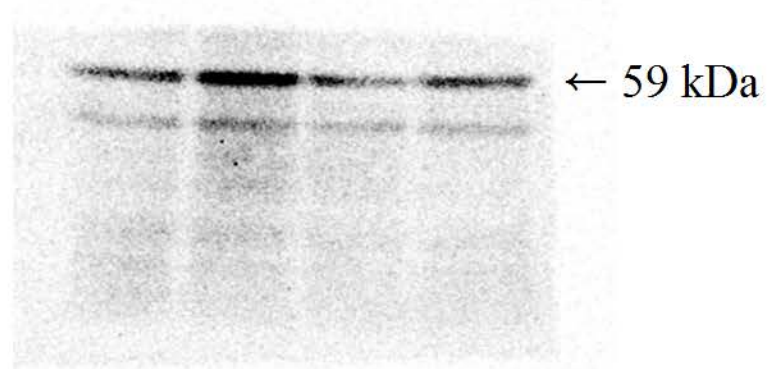

4C TYR

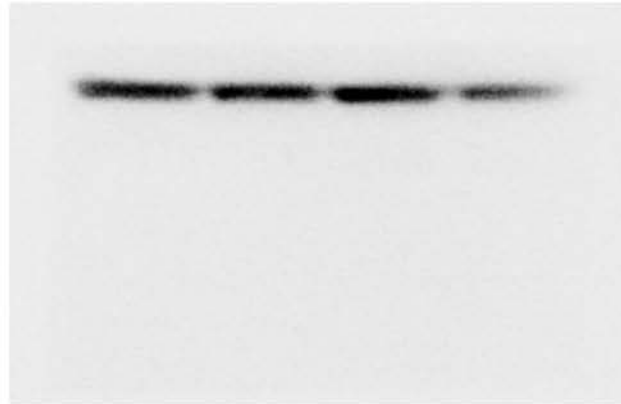

← 60 kDa
